# Supplementary material for: Application of an electronic tongue towards the analysis of brandies
Source: Royal Society of Chemistry journal article supplement (doi:10.1039/c2ay26066b), 2012-12-18
Supplement: c2ay26066b.pdf [file c2ay26066b.pdf]

# Application of an Electronic Tongue towards the analysis of brandies

Xavier Cetó<sup>1</sup>, Matias Llobet<sup>2</sup>, Joan Marco<sup>2</sup> and Manel del Valle<sup>1,\*</sup>

<sup>1</sup> *Sensors and Biosensors Group, Department of Chemistry, Universitat Autònoma de Barcelona, Edifici Cn, 08193 Bellaterra, Barcelona, SPAIN*

<sup>2</sup> *Miguel Torres SA, Vilafranca del Penedès, Barcelona, SPAIN*

## Supporting information

This supplementary provides further details of the samples under study as well as showing the voltammetric responses obtained for the both subsets of samples and the whole array of sensors.

Additionally, the number of features used in each model (and from which sensors they came from), which were selected by using the stepwise inclusion method, are summarized in Table S3.

---

\* E-mail: [manel.delvalle@uab.cat](mailto:manel.delvalle@uab.cat); tel: +34 93 5811017; fax: +34 93 5812379

**Table S1.** Detailed information for the first subset of samples (section 2.2.1).

| Sample | Vintage | Alcohol<br>by volume | Taste<br>classification | Butan-2-ol | Ethyl<br>acetate | Acetaldehyde | Butan-1-ol |
|--------|---------|----------------------|-------------------------|------------|------------------|--------------|------------|
| A1     | 2008    | 65.4                 | 1                       | -1         | -1               | -1           | 1          |
| A2     | 2009    | 65.0                 | 1                       | -1         | -1               | 1            | 0          |
| A3     | 2009    | 77.0                 | 1                       | -1         | -1               | 0            | 1          |
| A4     | 2010    | 65.0                 | 1                       | 1          | -1               | 0            | 0          |
| A5     | 2010    | 77.0                 | 1                       | 0          | 0                | 1            | 1          |
| A6     | 2010    | 65.0                 | 1                       | 0          | -1               | -1           | 1          |
| A7     | 2010    | 65.4                 | 1                       | 1          | -1               | 1            | 1          |
| A8     | 2011    | 65.0                 | 1                       | 1          | 1                | 1            | 1          |
| A9     | 2011    | 65.0                 | 1                       | -1         | 1                | 1            | 1          |
| A10    | 2011    | 65.2                 | 1                       | 0          | -1               | 0            | 1          |
| A11    | 2011    | 65.0                 | 1                       | -1         | 1                | 1            | -1         |
| A12    | 2011    | 77.2                 | 1                       | -1         | -1               | 1            | 1          |
| A13    | 2011    | 78.0                 | 1                       | -1         | 0                | 1            | 1          |
| A14    | 2012    | 77.2                 | 1                       | -1         | 0                | 1            | 1          |
| A15    | 2010    | 77.0                 | 2                       | 1          | -1               | -1           | 1          |
| A16    | 2010    | 65.0                 | 2                       | 1          | -1               | 0            | 1          |
| A17    | 2010    | 65.0                 | 2                       | 0          | -1               | -1           | 1          |
| A18    | 2011    | 65.0                 | 2                       | -1         | -1               | 0            | 1          |
| A19    | 2011    | 77.0                 | 2                       | -1         | -1               | -1           | 1          |
| A20    | 2011    | 77.2                 | 2                       | -1         | -1               | 1            | 1          |
| A21    | 2011    | 77.0                 | 2                       | -1         | 1                | 1            | 1          |
| A22    | 2011    | 77.0                 | 2                       | -1         | -1               | -1           | -1         |
| A23    | 2012    | 77.0                 | 2                       | 1          | -1               | 1            | 1          |
| A24    | 2010    | 70.0                 | 2                       | -1         | -1               | 1            | 0          |
| A25    | 2009    | 65.0                 | 3                       | -1         | -1               | -1           | 0          |
| A26    | 2009    | 65.0                 | 3                       | -1         | -1               | -1           | 0          |
| A27    | 2009    | 65.0                 | 3                       | -1         | -1               | -1           | 0          |
| A28    | 2010    | 65.0                 | 3                       | 0          | -1               | 0            | 1          |
| A29    | 2011    | 65.0                 | 3                       | -1         | -1               | 0            | 1          |
| A30    | 2011    | 77.0                 | 3                       | 1          | -1               | -1           | 1          |
| A31    | 2011    | 65.0                 | 3                       | -1         | -1               | 1            | 1          |
| A32    | 2011    | 65.0                 | 3                       | -1         | -1               | 1            | 1          |
| A33    | 2009    | 70.0                 | 3                       | -1         | -1               | -1           | -1         |
| A34    | 2009    | 70.0                 | 3                       | -1         | -1               | -1           | 0          |
| A35    | 2009    | 70.0                 | 3                       | -1         | -1               | -1           | 0          |
| A36    | 2009    | 70.0                 | 3                       | -1         | -1               | -1           | -1         |
| A37    | 2009    | 70.0                 | 3                       | -1         | -1               | -1           | -1         |
| A38    | 2009    | 70.0                 | 3                       | -1         | -1               | -1           | -1         |
| A39    | 2009    | 70.0                 | 3                       | -1         | -1               | -1           | 0          |
| A40    | 2011    | 65.0                 | 3                       | -1         | -1               | -1           | -1         |
| A41    | 2011    | 65.0                 | 3                       | -1         | -1               | 0            | -1         |

**Table S2.** Detailed information for the second subset of samples (section 2.2.2)

| Sample | Vintage | Alcohol<br>by volume | Ageing<br>method | I <sub>280</sub> index |
|--------|---------|----------------------|------------------|------------------------|
| B1     | 2009    | 69.5                 | Chips            | 14.1                   |
| B2     | 2008    | 69.5                 | New barrel       | 17.5                   |
| B3     | 2009    | 69.5                 | Chips            | 13.5                   |
| B4     | 2009    | 69.5                 | Chips            | 19.5                   |
| B5     | 2009    | 69.5                 | Chips            | 49                     |
| B6     | 2009    | 69.5                 | Chips            | 25.1                   |
| B7     | 2008    | 69.5                 | New barrel       | 29.4                   |
| B8     | 2009    | 69.5                 | Chips            | 37.9                   |
| B9     | 2009    | 69.5                 | Strips           | 27.6                   |
| B10    | 2009    | 69.5                 | Strips           | 25.6                   |
| B11    | 2009    | 69.5                 | Blocks           | 23.5                   |
| B12    | 2009    | 69.5                 | Sticks           | 16.2                   |
| B13    | 2009    | 69.5                 | Sticks           | 13.7                   |
| B14    | 2009    | 69.5                 | Sticks           | 12.3                   |
| B15    | 2009    | 69.5                 | Sticks           | 13.3                   |
| B16    | 2009    | 69.5                 | Sticks           | 22.3                   |
| B17    | 2009    | 69.5                 | Sticks           | 45.6                   |
| B18    | 2009    | 69.5                 | Sticks           | 64.2                   |
| B19    | 2008    | 69.5                 | New barrel       | 29.8                   |
| B20    | 2009    | 69.5                 | Chips            | 15.3                   |
| B21    | 2009    | 69.5                 | Chips            | 17.1                   |
| B22    | 2009    | 69.5                 | Sticks           | 9.7                    |
| B23    | 2009    | 69.5                 | Sticks           | 16.9                   |
| B24    | 2009    | 69.5                 | Sticks           | 13.5                   |
| B25    | 2009    | 69.5                 | Chips            | 10.6                   |
| B26    | 2009    | 69.5                 | Chips            | 19.6                   |
| B27    | 2009    | 69.5                 | Chips            | 11                     |
| B28    | 2009    | 69.5                 | Chips            | 20.5                   |
| B29    | 2009    | 69.5                 | Chips            | 32                     |
| B30    | 2009    | 69.5                 | Chips            | 79.8                   |
| B31    | 2009    | 69.5                 | Chips            | 99.6                   |
| B32    | 2009    | 69.5                 | Strips           | 20.2                   |
| B33    | 2009    | 69.5                 | Strips           | 30                     |

**Table S3.** Number of features (FFT coefficients) employed for building the different LDA models.

| <i>Sensor</i>                    | <i>Taste attributes</i> | <i>Ageing method</i> | <i>Vintage identification</i> |
|----------------------------------|-------------------------|----------------------|-------------------------------|
| Graphite-epoxy                   | 6                       | 4                    | 5                             |
| Cobalt (II) phthalocyanine       | 2                       | 1                    | 3                             |
| Platinum nanoparticle            | 4                       | 4                    | 4                             |
| Silver nanoparticle              | 9                       | 5                    | 5                             |
| Polypyrrole                      | 3                       | 4                    | 3                             |
| Copper nanoparticle              | 6                       | 3                    | 5                             |
| <b><i>Total coefficients</i></b> | <b>30</b>               | <b>21</b>            | <b>25</b>                     |

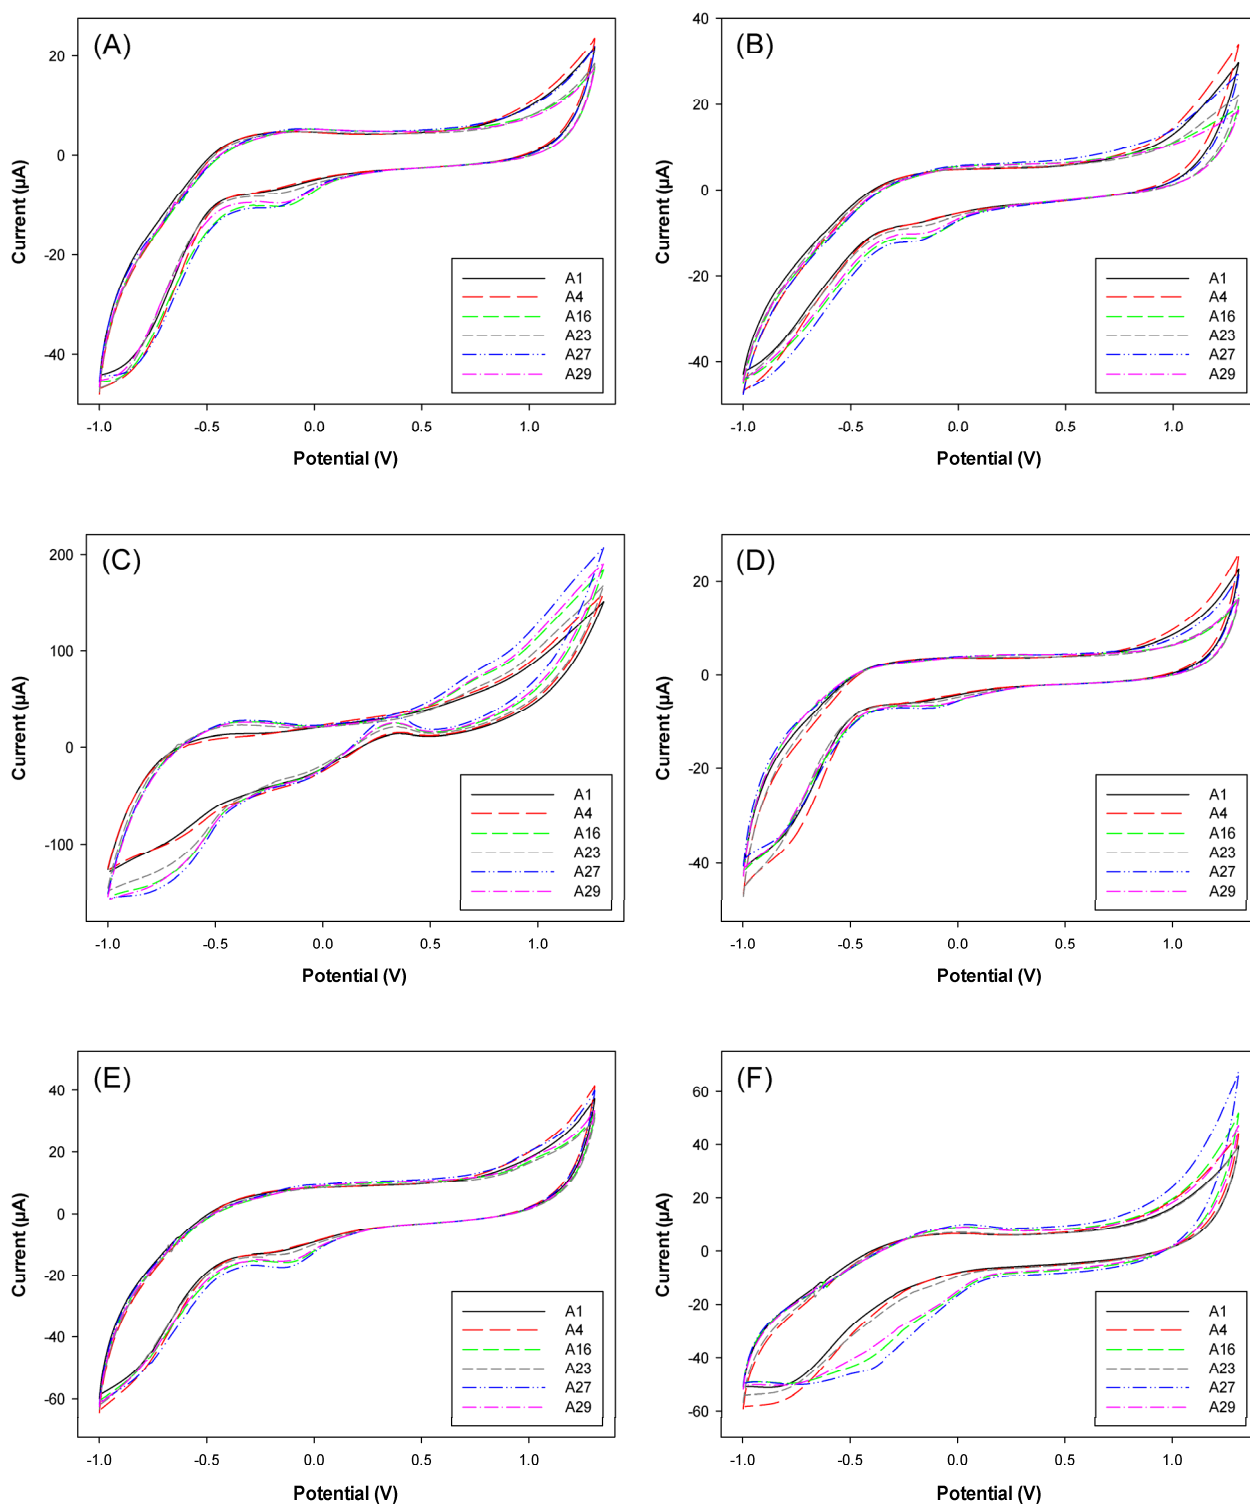

**Figure S1.** Example of the different obtained voltammograms for the first data set (section 2.2.1) obtained with the sensor array: (A) graphite-epoxy, (B) phthalocyanine, (C) platinum nanoparticle, (D) silver nanoparticle, (E) polypyrrole and (F) copper nanoparticle.

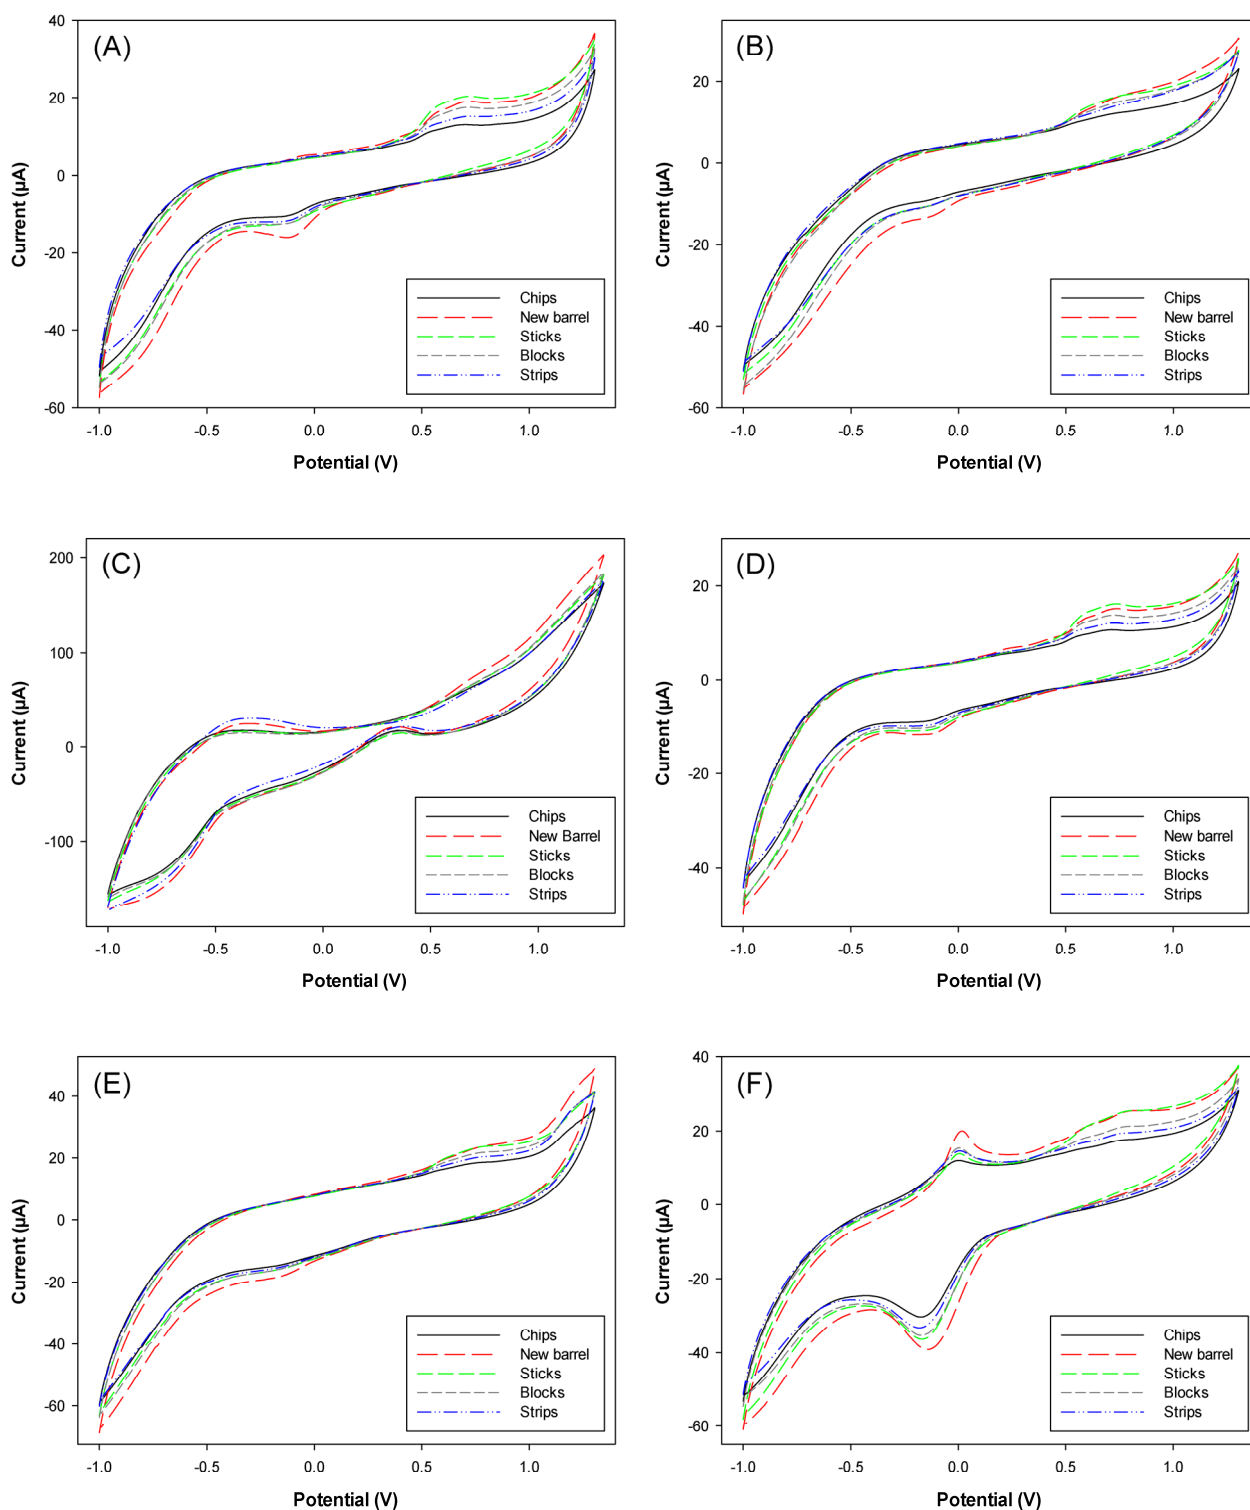

**Figure S2.** Example of the different obtained voltammograms for the second data set (section 2.2.2) obtained with the sensor array: (A) graphite-epoxy, (B) phthalocyanine, (C) platinum nanoparticle, (D) silver nanoparticle, (E) polypyrrole and (F) copper nanoparticle.
